# Supplementary material
Source: Research Square preprint supplement (doi:10.21203/rs.3.rs-7935756/v2)
Supplement: Supplementary file 1 [file 668343b02f26e306828f3d1d.docx]

| **Table 1: Baseline participant characteristics (n=26)** | |
| --- | --- |
| **Characteristic/measure** | **Mean ± standard deviation** |
| Sex (male/female) | 22/4 |
| Age (years) | 62.8 ± 6.5 |
| Height (cm) | 174.3 ± 9.6 |
| Weight (kg) | 87.6 ± 11.6 |
| BMI (kg/m2) | 28.8 ± 2.9 |
| Body fat (%) | 34.2 ± 5.2 |
| Systolic blood pressure (mm Hg) | 140.2 ± 10.4 |
| Diastolic blood pressure (mm Hg) | 85.7 ± 9.2 |
| Duration of diabetes (years) | 5.8 ± 4.8 |
| Diabetes management (*n*): |  |
| • Metformin | 18 |
| • Janumet (sitagliptin + metformin) | 4 |
| • Sulfonylurea | 6 |
| • SGLT2 inhibitor | 1 |
| • Lifestyle only | 4 |
| HbA1c mmol/mol (%) | 60 ±11 (7.6 ± 0.7) |
| Fasting glucose (mmol/l) | 9.1 ± 1.7 |
| Total cholesterol (mmol/l) | 4.9 ± 1.4 |
| LDL-C (mmol/l) | 2.6 ± 1.1 |
| HDL-C (mmol/l) | 1.3 ± 0.3 |
| Triglycerides (mmol/l) | 2.1 ± 0.9 |
| Plasma ascorbic acid (µmol/l) | 40.3 ± 16.7 |
| Estimated glomerular filtration rate (ml/min/1.73 m²) | 79.0 ± 11.2 |
| Albumin (g/l) | 40.0 ± 2.2 |
| Alanine aminotransferase (U/l) | 31.5 ± 13.5 |
|  |  |
| (Abbreviations: SGLT2, Sodium-Glucose Co-Transporter 2; HbA1c, haemoglobin A1c; LDL-C, low density lipoprotein cholesterol; HDL-C, high density lipoprotein cholesterol. Data adapted from Mason et al.(24)) | |
