# Supplementary material
Source: Research Square preprint supplement (doi:10.21203/rs.3.rs-7935756/v2)
Supplement: Supplementary file 3 [file b958e424f3c7abc536ea3209.docx]

**Table 3:** Protein candidates that correlated significantly with statistically significant clinical outcomes

| **Outcome** | **Outcome response with VC**1 | **Protein** | **Protein response with VC** | **Unadjusted r, p value** | **Adjusted r, p value**2 | **FDR of Adjusted analysis** |
| --- | --- | --- | --- | --- | --- | --- |
| Time of day in Hyperglycaemia (h)3 | ↓ | SAA1 | ↓ | 0.24, 0.034 | 0.23, 0.045 | *0.431* |
| CRP | ↓ | *0.21, 0.057* | 0.22, 0.047 | *0.431* |
| Total day (10.5h) Postprandial glucose AUC (mmol/min/l) | ↓ | SAA1 | ↓ | 0.26, 0.023 | 0.25, 0.027 | *0.292* |
| CRP | ↓ | 0.24, 0.030 | 0.23, 0.039 | *0.292* |
| Average 24h Glucose (mmol/l) | ↓ | SAA1 | ↓ | 0.29, 0.010 | 0.28, 0.011 | *0.168* |
| Systolic blood pressure (mmHg) | ↓ | ACTA1 | ↓ | 0.30, 0.007 | 0.32, 0.004 | 0.018 |
| TRAP1 | ↓ | 0.40, 0.004 | 0.39, 0.006 | 0.024 |
| HSPA1 | ↓ | 0.33, 0.003 | 0.38, <0.001 | 0.010 |
| ALCAM | ↑ | -0.43, 0.005 | -0.45, 0.003 | 0.018 |
| Diastolic blood pressure (mmHg) | ↓ | ACTA1 | ↓ | 0.30, 0.006 | 0.30, 0.006 | *0.096* |
| TRAP1 | ↓ | 0.35, 0.014 | 0.33, 0.022 | *0.113* |
| HSPA1 | ↓ | 0.25, 0.023 | 0.26, 0.019 | *0.113* |

(1As reported in Mason et al.(24) 2Outcomes were adjusted for: body weight, per cent body fat, estimated glomerular filtration rate, accelerometer-determined physical activity energy expenditure, cross-over period, and medication compliance 3log10 transformed. Darker shaded cells with italicised text represent non-significant data. FDR – false discovery rate).
