# Supplementary material
Source: Research Square preprint supplement (doi:10.21203/rs.3.rs-7935756/v2)
Supplement: Supplementary file 5 [file ee937ca4c56794cfe497de45.docx]

**Table 2**: Candidate plasma proteins altered following vitamin C supplementation compared with control

| **TIER 1 CANDIDATES** | | | |  | |  |
| --- | --- | --- | --- | --- | --- | --- |
|  | ***Main analysis*** | | ***Unfiltered/non-imputed analysis*** | | **Missing Data1** | **Biological Processes** |
| **Gene symbol** | **log2 fold change** | **FDR** | **log2 fold change** | **FDR** |  |
| MYH1 | -1.516 | 5.055E-04 | -1.445 | 1.894E-07 | 0% | muscle contraction, sensory perception of sound |  |
| AMY1B/C/A | -1.385 | 3.778E-03 | -1.431 | 8.358E-10 | 0% | oligosaccharide metabolic process, carbohydrate metabolic process |  |
| TRAP1 | -1.172 | 5.255E-04 | -1.132 | 2.009E-03 | 30% | negative regulation of cellular respiration, negative regulation of reactive oxygen species biosynthetic process, protein folding, translational attenuation |  |
| SAA1 | -1.011 | 1.964E-03 | -1.062 | 5.816E-03 | 0% | positive regulation of cytokine production, acute-phase response, platelet activation, neutrophil chemotaxis, positive regulation of interleukin-1 production, positive regulation of cell adhesion, macrophage chemotaxis, lymphocyte chemotaxis, regulation of protein secretion, negative regulation of inflammatory response |  |
| DCD | -0.987 | 1.956E-02 | -0.973 | 1.786E-02 | 0% | antimicrobial humoral immune response mediated by antimicrobial peptide, defence response to bacterium, defence response to fungus, killing by host of symbiont cells, proteolysis |  |
| EIF2B2 | -0.790 | 1.974E-05 | -0.723 | 3.568E-04 | 8% | cytoplasmic translational initiation, translational initiation, regulation of translational initiation, central nervous system development, response to heat, response to glucose, oligodendrocyte development, myelination, response to peptide hormone, T cell receptor signalling pathway |  |
| HSP90AB1 | -0.707 | 2.092E-04 | -0.318 | 1.687E-03 | 8% | cellular response to heat, chaperone-mediated protein complex assembly, negative regulation of proteasomal ubiquitin-dependent protein catabolic process, positive regulation of protein localization to cell surface, regulation of cell cycle, regulation of protein ubiquitination, response to unfolded protein |  |
| H4C16 | -0.698 | 1.102E-03 | -0.629 | 4.393E-04 | 0% | chromatin organization, negative regulation of megakaryocyte differentiation, nucleosome assembly, |  |
| ACTA1 | -0.596 | 3.243E-02 | -0.638 | 1.946E-03 | 0% | mesenchyme migration, muscle contraction, positive regulation of gene expression, skeletal muscle fibre development, skeletal muscle thin filament assembly |  |
| ALCAM | 0.801 | 7.838E-07 | 0.573 | 2.534E-02 | 36% | adaptive immune response, axon extension involved in axon guidance, cell adhesion, heterophilic cell-cell adhesion via plasma membrane cell adhesion molecules, motor neuron axon guidance, signal transduction |  |
| **TIER 2 CANDIDATES** | | | |  | |  |
|  | ***Main analysis*** | | ***Unfiltered/non-imputed analysis*** | | **Missing Data1** | **Biological Processes** |
| **Gene symbol** | **log2 fold change** | **FDR** | **log2 fold change** | **FDR** |  |
| CRP | -0.798 | 1.187E-02 | -0.580 | 2.202E-01 | 0% | vasoconstriction, acute-phase response, inflammatory response, negative regulation of macrophage derived foam cell differentiation, negative regulation of lipid storage, regulation of interleukin-8 production, positive regulation of superoxide anion generation, negative regulation of mononuclear cell proliferation, innate immune response |  |
| ATP6V1B2 | -0.604 | 2.615E-09 | -0.631 | 1.246E-01 | 37% | ATP metabolic process, proton transmembrane transport, regulation of macroautophagy, synaptic vesicle lumen and vacuolar acidification |  |
| HSPA1A/B | -0.503 | 7.806E-06 | -0.197 | 4.308E-01 | 0% | ATP metabolic process, cellular response to heat, oxidative stress, and to unfolded protein, chaperone-mediated protein complex assembly, endoplasmic reticulum unfolded protein response, negative regulation of apoptotic process, cell growth, and protein ubiquitination, positive regulation of interleukin-8 production, NF-kappaB transcription factor activity, and tumor necrosis factor-mediated signaling pathway |  |
| CA2 | 0.594 | 1.164E-02 | 0.535 | 3.858E-01 | 5% | angiotensin-activated signaling pathway, carbon dioxide transport, morphogenesis of an epithelium, positive regulation of cellular pH reduction, positive regulation of dipeptide transmembrane transport |  |
| HIVEP1 | 0.739 | 1.156E-02 | 0.434 | 5.863E-01 | 37% | BMP signaling pathway, regulation of transcription by RNA polymerase II |  |
|  |  |  |  |  |  |  |  |

(Tier 1 candidates were statistically significant in both analyses with directionally consistent effects. Tier 2 candidates were significant in the main analysis only but with directional consistency in the unfiltered/non-imputed analysis;1Missing data is the percentage of data missing across all samples prior to imputation)
